# Supplementary material for: Metabolic cross-feeding in imbalanced diets allows gut microbes to improve reproduction and alter host behaviour
Source: PubMed Central journal article supplement (PMC7447780; doi:10.1038/s41467-020-18049-9), 2020-08-25
Supplement: 41467_2020_18049_MOESM1_ESM.pdf [file 41467_2020_18049_MOESM1_ESM.pdf]

## ***Supplementary Information***

### **Metabolic cross-feeding in imbalanced diets allows gut microbes to improve reproduction and alter host behaviour**

#### ***Authors***

Sílvia F. Henriques<sup>1</sup>, Darshan B. Dhakan<sup>1+</sup>, Lúcia Serra<sup>1+</sup>, Ana Patrícia Francisco<sup>1</sup>, Zita Carvalho-Santos<sup>1</sup>, Célia Baltazar<sup>1</sup>, Ana Paula Elias<sup>1</sup>, Margarida Anjos<sup>1</sup>, Tong Zhang<sup>2</sup>, Oliver D. K. Maddocks<sup>2</sup>, Carlos Ribeiro<sup>\*1</sup>

#### ***Affiliations***

<sup>1</sup> Behavior and Metabolism Laboratory, Champalimaud Research, Champalimaud Centre for the Unknown, Lisbon, 1400-038, Portugal

<sup>2</sup> University of Glasgow Institute of Cancer Sciences, Switchback Road, Glasgow G61 1QH, UK

+ Authors contributed equally

\*Correspondence to:

[carlos.ribeiro@neuro.fchampalimaud.org](mailto:carlos.ribeiro@neuro.fchampalimaud.org)

## Supplementary Figures

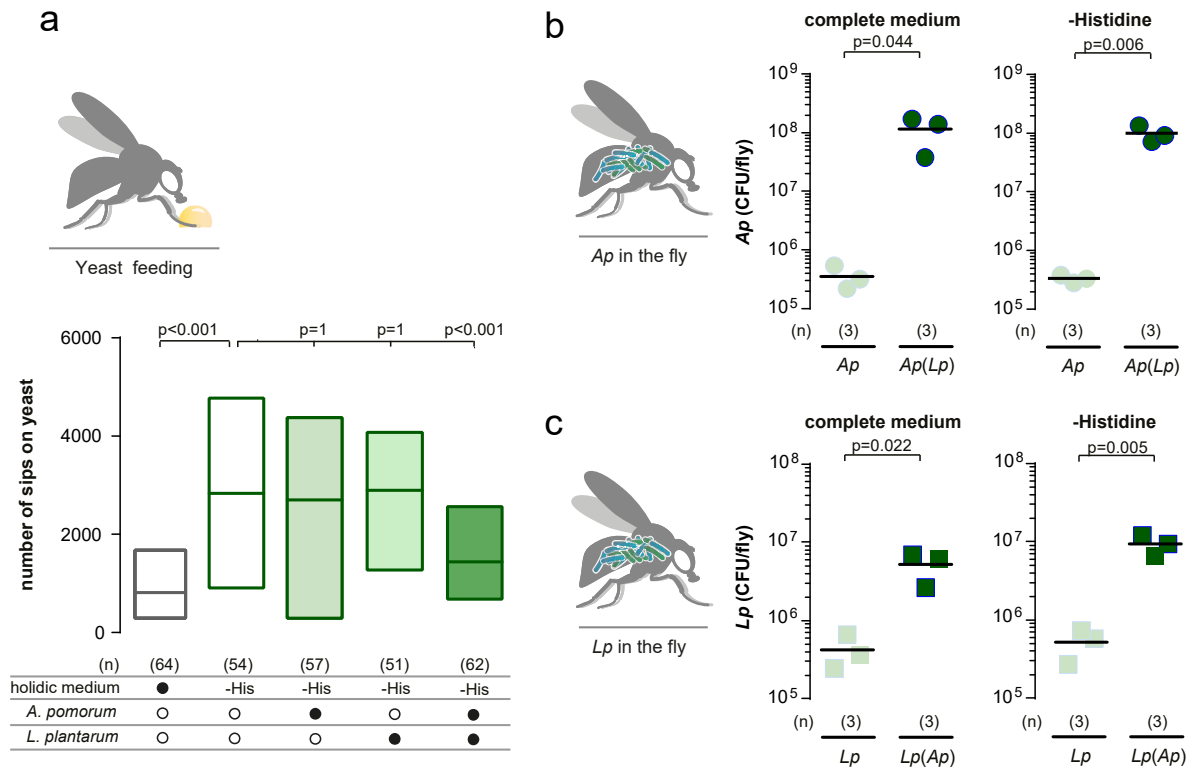

### Supplementary Figure 1 – *Ap/Lp* biassociation reduces yeast appetite and promotes bacterial growth independently of dietary His content. (a) Number of sips on yeast of flies kept in complete holidic medium or medium without His (-His) that were monoassociated (light green) with *Ap* or *Lp*, or biassociated (dark green) with both commensal species. Empty boxes represent germ-free conditions and filled boxes represent bacteria-associated conditions. Boxes represent median with upper and lower quartiles. n represents the number of flies assayed per condition. Significance was tested using a Kruskal–Wallis test with Dunn’s multiple comparison test. Filled black circles represent a complete holidic medium or association with specific bacteria. Open black circles represent the absence of specific bacteria. (b and c) Number of *Ap* (circles, b) and *Lp* (squares, c) colony-forming units (CFUs) from extracts of monoassociated (light green) and biassociated (dark green) flies kept in complete holidic media, or medium lacking His (-Histidine). *Ap* and *Lp* label data points represent the number of CFUs detected in monoassociated flies and *Ap(Lp)* and *Lp(Ap)* the measurement of *Ap* or *Lp* in biassociated flies. Each data point represents the number of CFUs detected in independent fly extracts (n), and the black line represents the mean. Significance was tested using an unpaired two-tailed student t-test. Source data are provided as a Source Data file.

(a) Number of sips on yeast of flies kept in complete holidic medium or medium without His (-His) that were monoassociated (light green) with *Ap* or *Lp*, or biassociated (dark green) with both commensal species. Empty boxes represent germ-free conditions and filled boxes represent bacteria-associated conditions. Boxes represent median with upper and lower quartiles. n represents the number of flies assayed per condition. Significance was tested using a Kruskal–Wallis test with Dunn’s multiple comparison test. Filled black circles represent a complete holidic medium or association with specific bacteria. Open black circles represent the absence of specific bacteria. (b and c) Number of *Ap* (circles, b) and *Lp* (squares, c) colony-forming units (CFUs) from extracts of monoassociated (light green) and biassociated (dark green) flies kept in complete holidic media, or medium lacking His (-Histidine). *Ap* and *Lp* label data points represent the number of CFUs detected in monoassociated flies and *Ap(Lp)* and *Lp(Ap)* the measurement of *Ap* or *Lp* in biassociated flies. Each data point represents the number of CFUs detected in independent fly extracts (n), and the black line represents the mean. Significance was tested using an unpaired two-tailed student t-test. Source data are provided as a Source Data file.

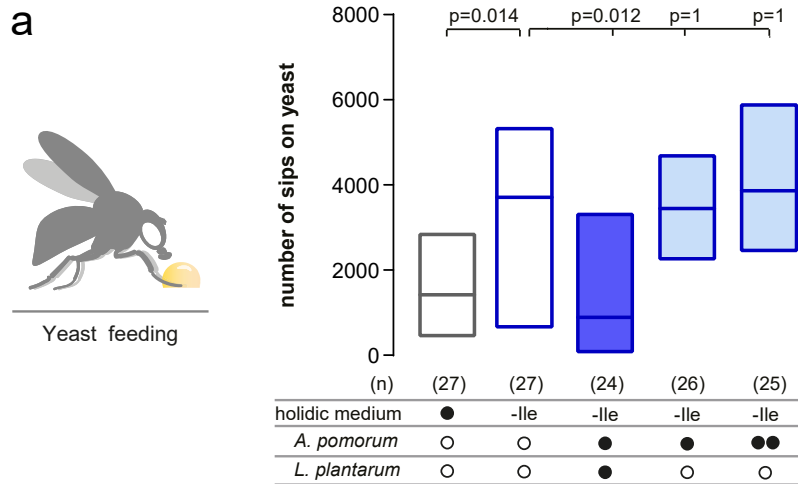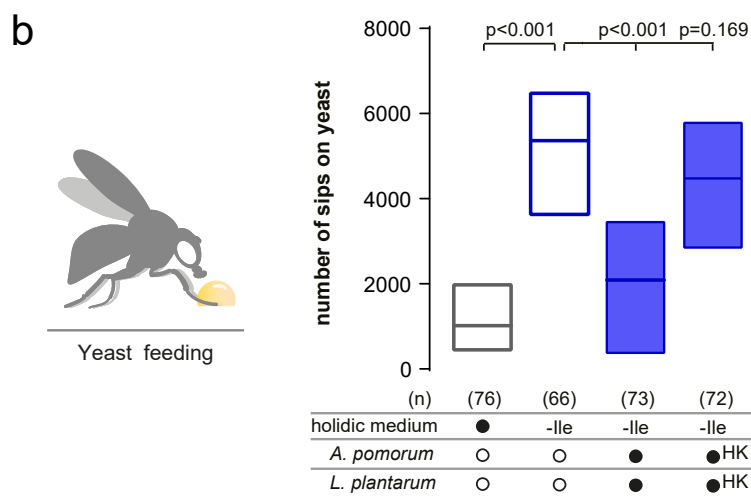

**Supplementary Figure 2 – Association with high titres of *Ap* or high amounts of heat-killed bacteria do not reduce the yeast appetite of the fly. (a and b)**

Number of sips on yeast of either germ-free flies (empty boxes) kept in complete holidic medium (grey border boxes) or medium without Ile (-Ile, blue border boxes), or flies that were monoassociated (light blue) with *Ap*, or biassociated (dark blue) with both *Ap* and *Lp*. Filled black circles represent a complete holidic medium or association with *Ap* or *Lp*. In (a) two filled black circles indicate the association of germ-free flies with a high titre of  $10^9$  *Ap* cells. In (b) HK indicates flies repeatedly treated with Heat-Killed bacteria ( $1.01 \times 10^9$  *Ap* and  $1.31 \times 10^9$  *Lp*) throughout the three days of Ile deprivation. (a and b) Boxes represent median with upper and lower quartiles. n represents the number of flies assayed per condition. Significance was tested using a Kruskal–Wallis test with Dunn’s multiple comparison test. Filled black circles represent a complete holidic medium or association with specific bacteria. Open black circles represent the absence of specific bacteria. Source data are provided as a Source Data file.

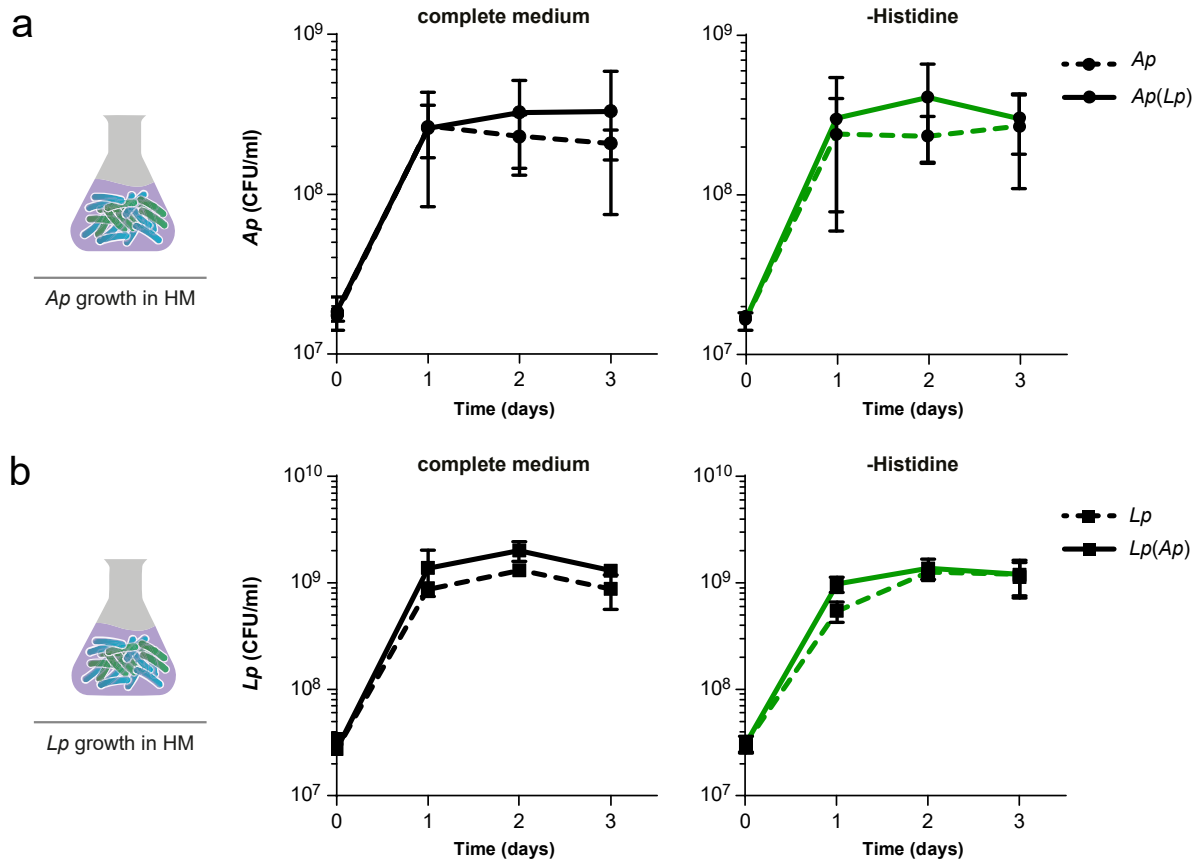

**Supplementary Figure 3 – *In vitro* growth measurements show that removing His from the diet does not affect *Ap* or *Lp* growth.** *In vitro* growth curves of *Ap* (a) and *Lp* (b) in complete liquid holidic medium (black line) or liquid medium without His (green line) plotted as CFUs at different time intervals. Data points connected by dashed lines represent the number of CFUs detected in cultures of individual species (*Ap* or *Lp*) and the data points connected by continuous lines, the number of *Ap* (labelled as *Ap(Lp)*) or *Lp* (labelled as *Lp(Ap)*) CFUs in co-culture conditions. The number of CFUs per ml of culture was determined by cultivating liquid culture samples in selective media at the indicated time points. For each condition, three independent bacterial cultures were sampled at 0 h, 24 h, 48 h, and 72 h, except for the *Lp* single culture grown in media lacking His for which four cultures were sampled. Each data point represents the mean CFUs from independent bacterial cultures and the error bars the standard deviation (s.d.). Source data are provided as Source data file.

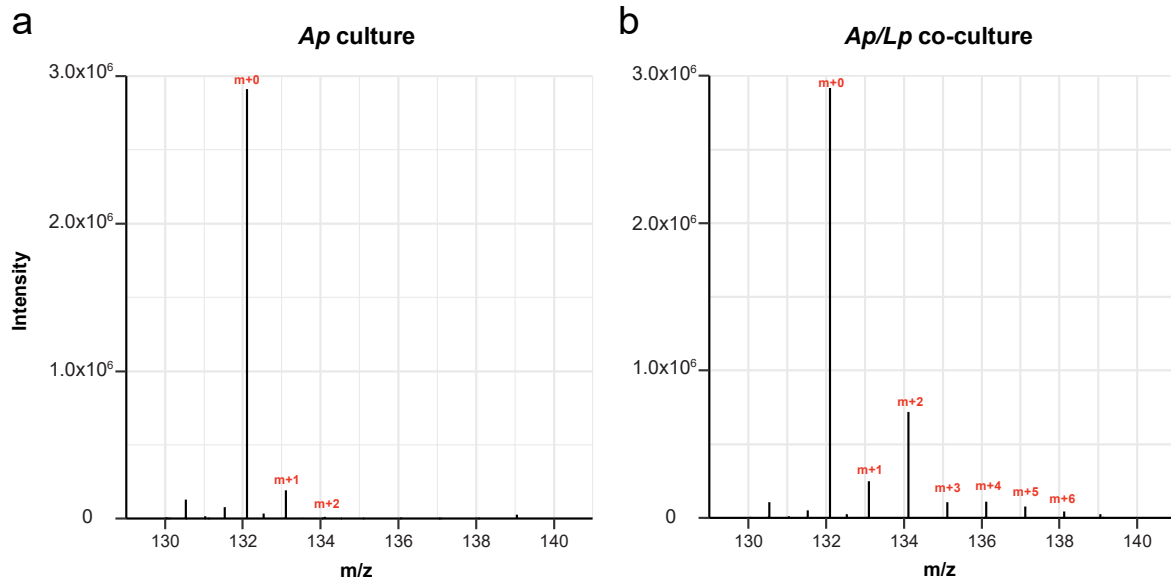

**Supplementary Figure 4 – Raw mass spectra of Ile from *Ap* single culture and *Ap/Lp* co-culture.** Raw unprocessed mass spectra of Isoleucine in positive ion mode is shown for **(a)** an *Ap* single culture and **(b)** an *Ap/Lp* co-culture that were cultivated for 24 h in holidic medium lacking Ile and containing  $^{13}\text{C}$  labelled glucose. The mass spectra represent peaks at the retention time of 730 s (12.1 mins) for each individual isotopologues ( $^{13}\text{C}$  labelled) of Ile. The x-axis represents mass/charge ratio ( $m/z$ ), whereas the y-axis represents the raw intensity values (without corrections) of the identified isotopologues of Ile.

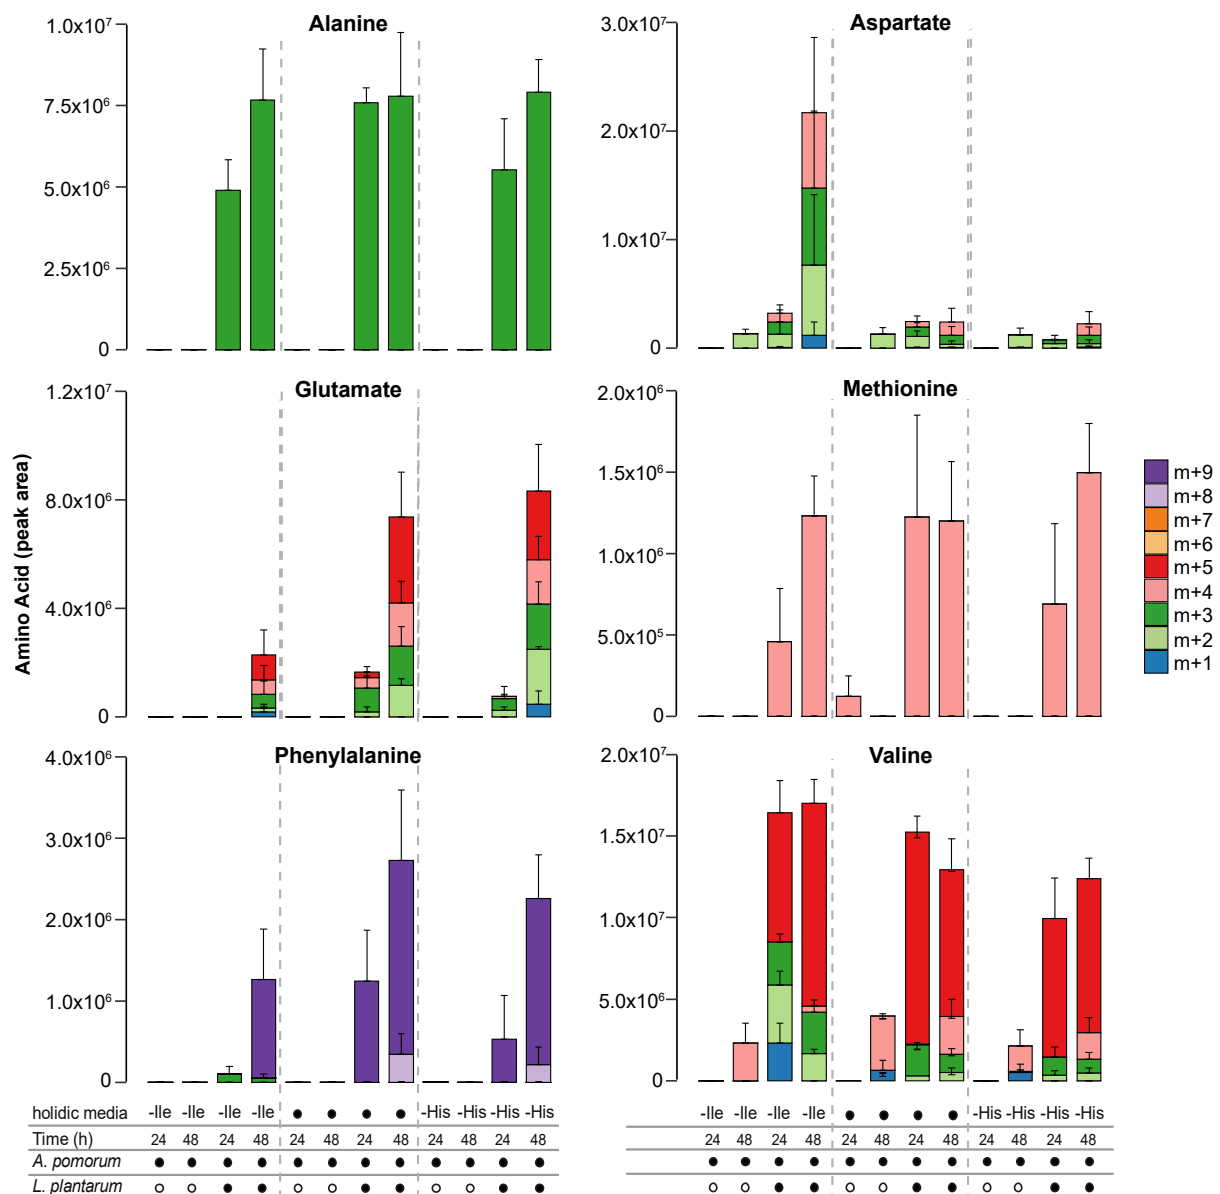

**Supplementary Figure 5 – Synthesis of AAs is increased in the presence of *Lp*.** The stacked bars represent the relative amount of isotopologues of each indicated AA measured in the supernatant of bacterial cultures grown in either media lacking Ile (-Ile), or in complete liquid holidic medium (filled black circles), or media lacking His (-His), containing uniformly  $^{13}\text{C}$  labelled glucose. Heavy-labelled isotopologues were measured using LC-MS in samples collected after 24 h and 48 h of bacterial growth and displayed as metabolite peak area. The number of heavy carbons incorporated per molecule is indicated as m+n, where m = molecular mass of the metabolite and n = the number of  $^{13}\text{C}$ . Filled black circles represent the presence and open black circles the absence of specific bacteria. For each condition, three independent bacterial cultures were sampled. The plots represent the mean values of the amount of the detected isotopologues per condition and the error bars represent the s.e.m.. Source data are provided as a Source Data file.

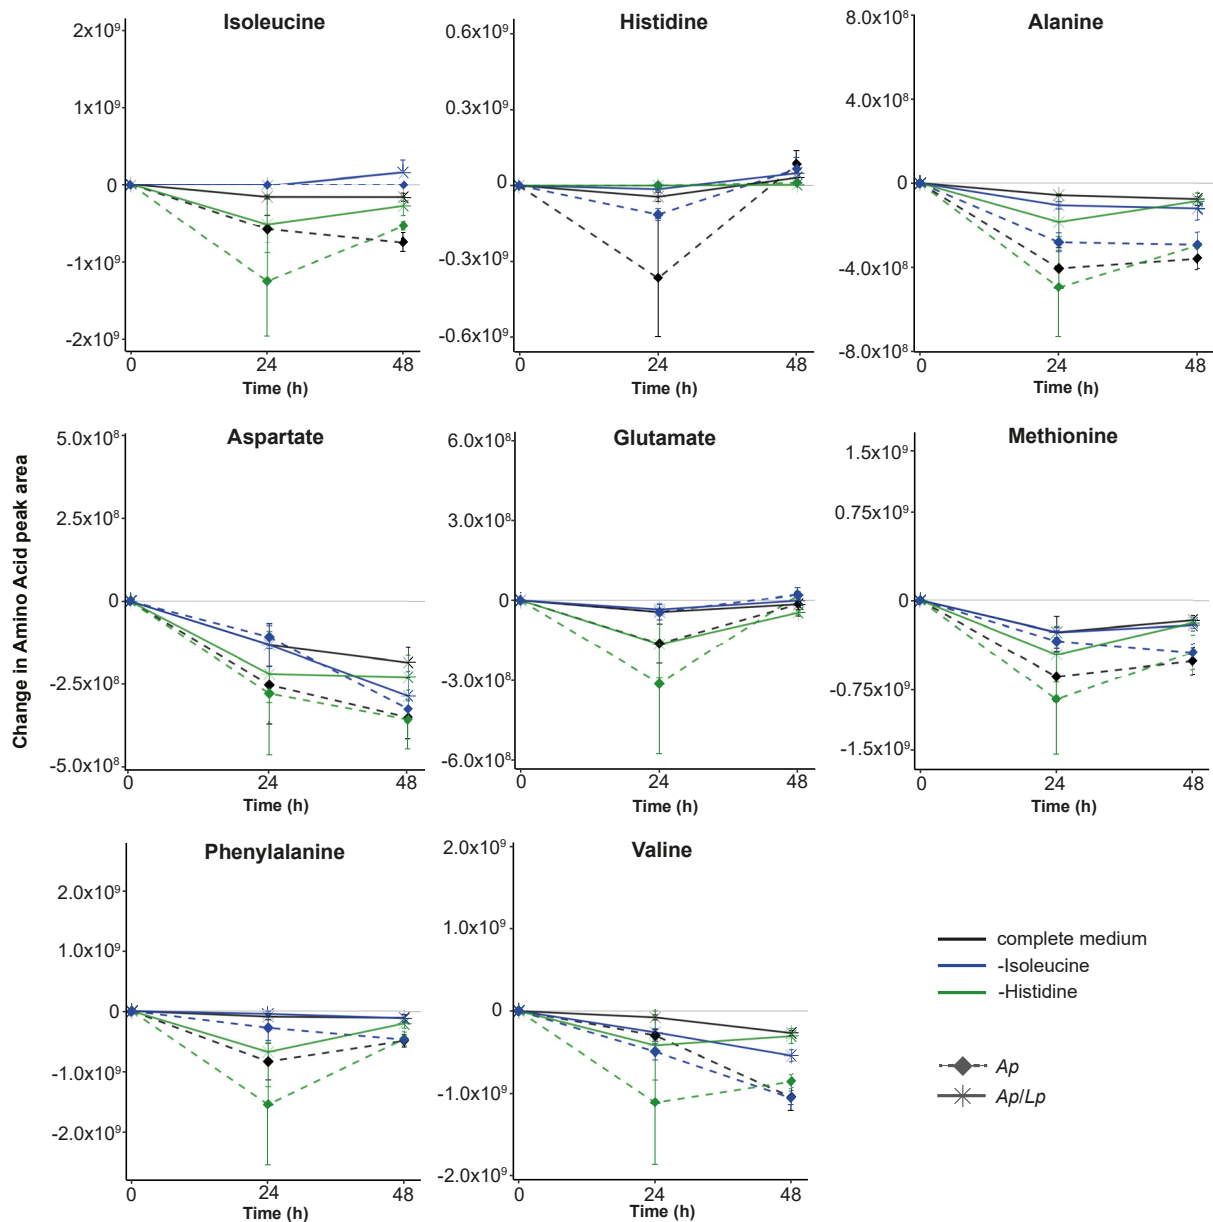

**Supplementary Figure 6 – Commensal bacteria utilize amino acids in the HM.** Each data point represents the change in the amount of different unlabelled ( $m+0$ ) AAs in the bacterial culture compared to the amount found in control media conditions (without bacterial growth). Single cultures of *Ap* (diamonds connected with dashed line) and co-cultures of *Ap/Lp* (stars connected with a continuous line) were grown in complete holidic medium (black lines) and medium lacking either Ile (blue lines) or His (green lines) containing uniformly  $^{13}\text{C}$  labelled Glucose. Non-labelled AAs ( $m+0$ ) were measured using LC-MS in samples collected after 0 h, 24 h, and 48 h of bacterial growth and displayed as metabolite peak area. Data are from the same dataset as Fig. 3 and Supplementary Figure 5. For each condition, three independent bacterial cultures were sampled. Each data point represents the mean change in the amount of the detected AAs per condition and the error bars represent the s.e.m.. Source data are provided as a Source Data file.

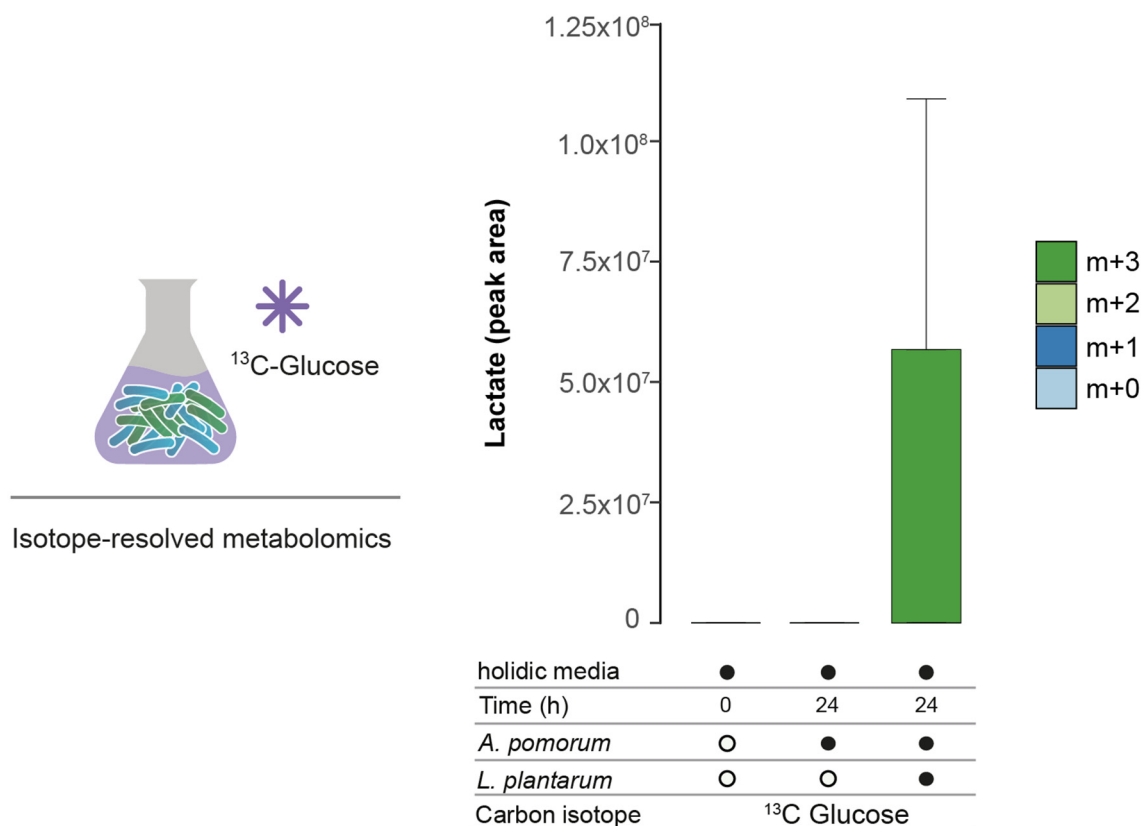

**Supplementary Figure 7 – Lactate is produced in *Lp* cultures.** Bars represent the relative amount of heavy lactate measured in the supernatant of bacterial cultures grown in complete liquid holidic medium containing uniformly  $^{13}\text{C}$  labelled glucose ( $^{13}\text{C}$ -glucose). Heavy labelled lactate was measured using LC-MS in samples collected after 0 h or 24 h of bacterial growth and displayed as metabolite peak area. The number of heavy carbons incorporated per molecule is indicated as  $m+n$ , where  $m$  = molecular mass of the metabolite and  $n$  = the number of  $^{13}\text{C}$ . Filled black circles represent the presence of specific bacteria in the culture. Open black circles represent the absence of specific bacteria. For each condition, three independent bacterial cultures were sampled. The plots represent the mean amount of the detected lactate isotopologues per condition and the error bars represent the s.e.m.. Source data are provided as a Source Data file.



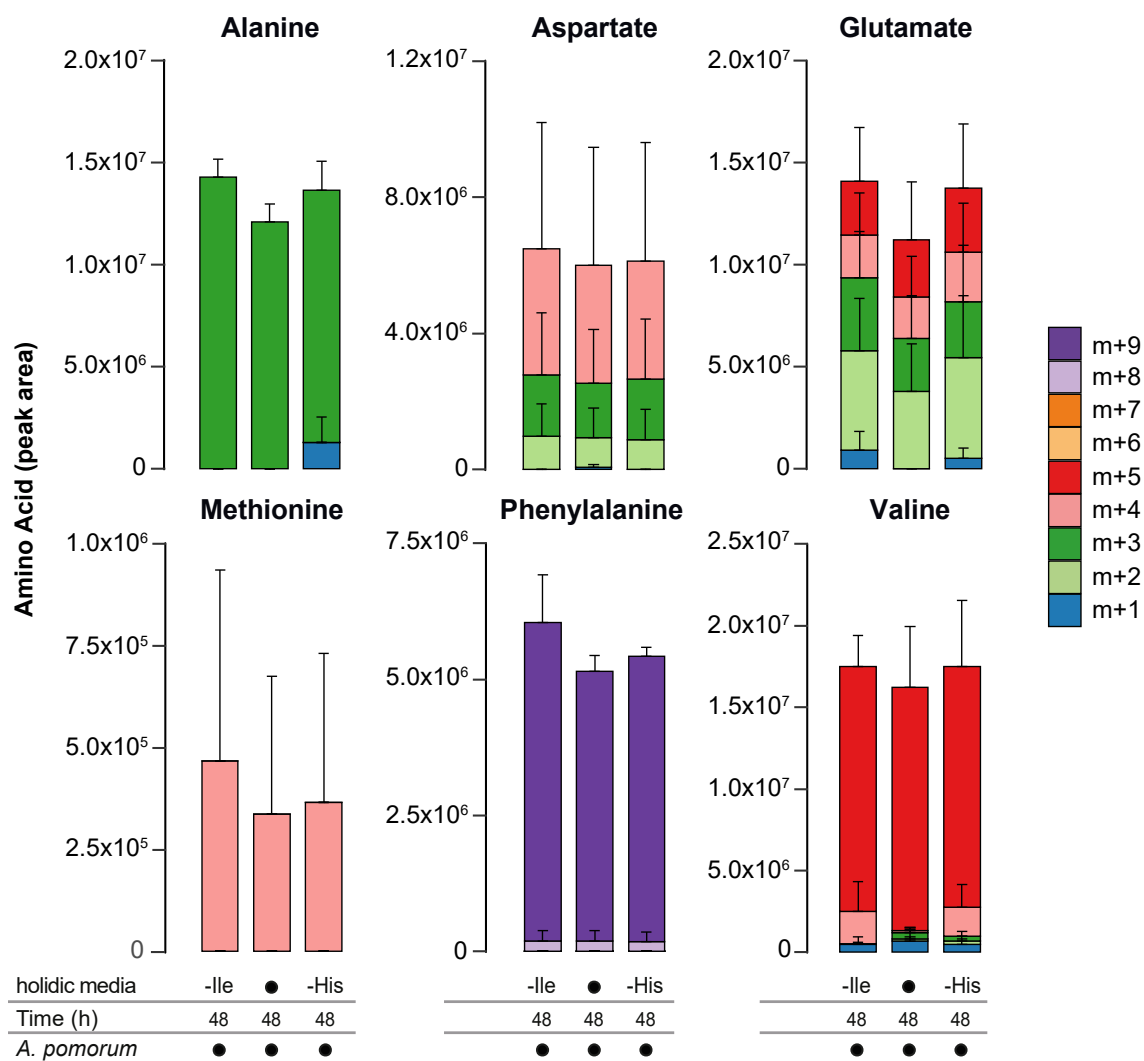

**Supplementary Figure 8 – Secreted AAs are synthesized from lactate.** The stacked bars represent the relative amount of isotopologues of each indicated AA measured in the supernatant of bacterial cultures grown in complete liquid holidic medium (filled black circles) or in media lacking Ile (-Ile) or His (-His) containing uniformly  $^{13}\text{C}$  labelled lactate ( $^{13}\text{C}$ -lactate). Heavy labelled isotopologues were measured using LC-MS in samples collected after 48 h of bacterial growth and displayed as metabolite peak area. The number of heavy carbons incorporated per molecule is indicated as m+n, where m = molecular mass of the metabolite and n = the number of  $^{13}\text{C}$ . Filled black circles represent the presence of specific bacteria in the culture. For each condition, three independent bacterial cultures were sampled. The plots represent the mean amounts of the detected isotopologues per condition and the error bars represent the s.e.m.. Source data are provided as a Source Data file.

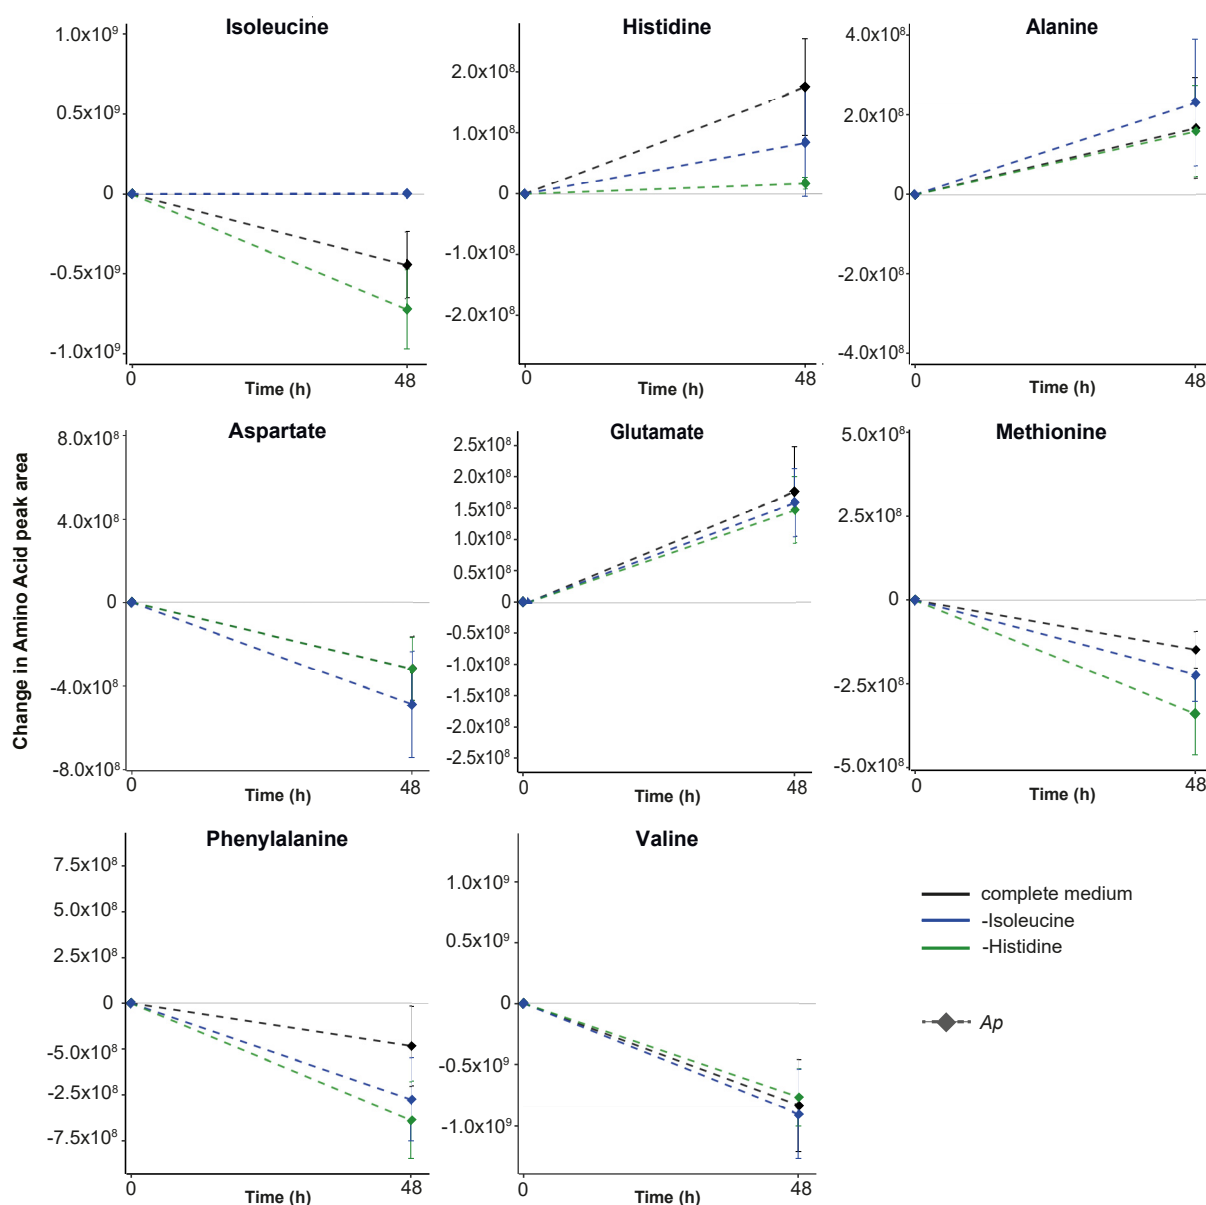

**Supplementary Figure 9 – Commensal bacteria utilize amino acids in the HM (data using <sup>13</sup>C-lactate).** Each data point represents the change in the amount of different unlabelled (m+0) AAs in the bacterial culture compared to the amount found in control media conditions (without bacterial growth). Single cultures of *Ap* (diamonds connected with dashed line) were grown in complete holidic medium (black lines) and medium lacking either Ile (blue lines) or His (green lines) containing uniformly <sup>13</sup>C labelled Lactate. Non-labelled AAs (m+0) were measured using LC-MS in samples collected after 0 h and 48 h of bacterial growth and displayed as metabolite peak area. Data are from the same dataset as Fig. 5a and Supplementary Figure 8. Each data point represents the mean change in the amount of the detected AAs per condition and the error bars represent the s.e.m.. Source data are provided as a Source Data file.

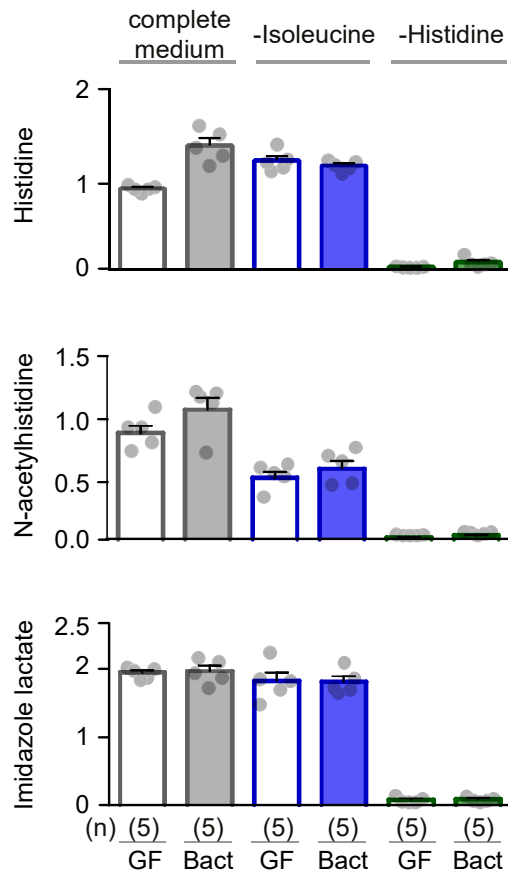

**Supplementary Figure 10 – His and His degradation products are not increased in heads of flies inoculated with bacteria.** Bars represent the mean relative abundance of His and His degradation metabolites, as measured in metabolomics experiments from heads of germ-free flies (GF) and flies inoculated with commensal bacteria (Bact) and maintained in either complete holidic medium (grey boxes), medium lacking Ile (blue boxes), or medium lacking His (green boxes). Grey circles represent measurements of metabolites in independent extracts of heads of flies (n), the columns represent the mean and the error bars the s.d.. Source data are provided as a Source Data file.

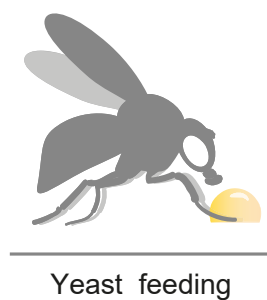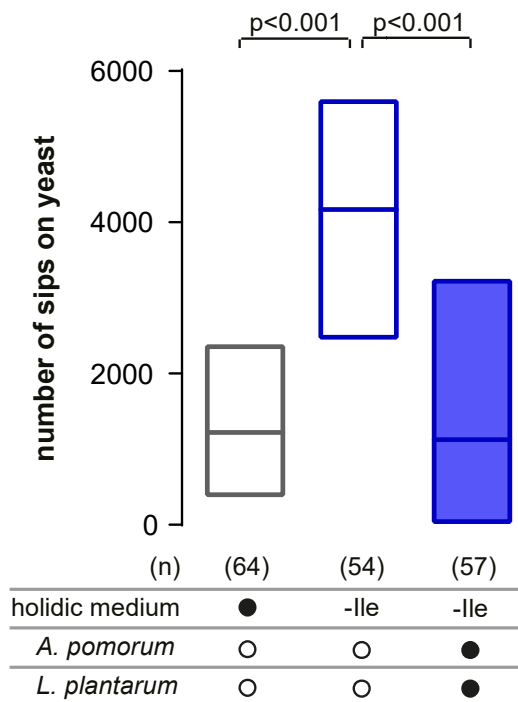

**Supplementary Figure 11 – Glucose and sucrose affect fly’s yeast preferences to the same extent.** Number of sips on yeast of germ-free (empty boxes) flies or flies biassociated (blue boxes) with *Ap* and *Lp* that were kept in complete holidic medium or medium without Ile (-Ile) where an equimolar concentration of the monosaccharide glucose (100 mM) was used as a carbon source in the holidic medium (see Methods section), instead of the disaccharide sucrose (50 mM). Boxes represent median with upper and lower quartiles. n represents the number of flies assayed per condition. Significance was tested using a Kruskal–Wallis test with Dunn’s multiple comparison test. Filled black circles represent a complete holidic medium or association with *Ap/Lp*. Open black circles represent the absence of bacteria. Source data are provided as a Source Data file.

## Supplementary Tables

**Supplementary Table 1. Enzymes predicted to mediate the biosynthesis of Ile from lactate in the *Acetobacter pomorum* strain DM001.** Information used to infer the pathway depicted in Figure 5b.

| Reaction Step | Enzyme Name                                                                            | Reaction                                                                              | Gene Name      | KEGG reference ID |
|---------------|----------------------------------------------------------------------------------------|---------------------------------------------------------------------------------------|----------------|-------------------|
| 1             | D-lactate dehydrogenase (cytochrome) [EC:1.1.2.4]                                      | Lactate + NAD <sup>+</sup> => Pyruvate + NADH                                         | WP_006115901.1 | apk:APA386 B_1053 |
| 1             | D-lactate dehydrogenase [EC:1.1.1.28]                                                  | Lactate + NAD <sup>+</sup> => Pyruvate + NADH                                         | WP_035350829.1 | apk:APA386 B_910  |
| 2             | pyruvate dehydrogenase E1 component subunit beta [EC:1.2.4.1]                          | Pyruvate + CoA + NAD <sup>+</sup> => Acetyl CoA + NADH + CO <sub>2</sub>              | WP_035354176.1 | apk:APA386 B_2084 |
| 2             | pyruvate dehydrogenase E1 component subunit beta [EC:1.2.4.1]                          | Pyruvate + CoA + NAD <sup>+</sup> => Acetyl CoA + NADH + CO <sub>2</sub>              | WP_035351377.1 | apk:APA386 B_2737 |
| 2             | pyruvate dehydrogenase E1 component subunit alpha [EC:1.2.4.1]                         | Pyruvate + CoA + NAD <sup>+</sup> => Acetyl CoA + NADH + CO <sub>2</sub>              | WP_006115287.1 | apk:APA386 B_2738 |
| 2             | pyruvate dehydrogenase E1 component subunit alpha [EC:1.2.4.1]                         | Pyruvate + CoA + NAD <sup>+</sup> => Acetyl CoA + NADH + CO <sub>2</sub>              | WP_035354178.1 | apw:APA42 C_05940 |
| 2             | pyruvate dehydrogenase E2 component (dihydrolipoamide acetyltransferase) [EC:2.3.1.12] | Pyruvate + CoA + NAD <sup>+</sup> => Acetyl CoA + NADH + CO <sub>2</sub>              | WP_006115285.1 | apk:APA386 B_2736 |
| 2             | pyruvate dehydrogenase E2 component (dihydrolipoamide acetyltransferase) [EC:2.3.1.12] | Pyruvate + CoA + NAD <sup>+</sup> => Acetyl CoA + NADH + CO <sub>2</sub>              | WP_006117117.1 | apk:APA386 B_2085 |
| 3             | citrate synthase [EC:2.3.3.1]                                                          | Acetyl CoA + Oxaloacetate + H <sub>2</sub> O => Citrate + CoA + H <sup>+</sup>        | WP_035351757.1 | apk:APA386 B_2584 |
| 4             | aspartate aminotransferase [EC:2.6.1.1]                                                | Oxaloacetate + Glutamate => Aspartate + 2-oxoglutarate                                | WP_006117475.1 | apk:APA386 B_861  |
| 4             | aspartate aminotransferase [EC:2.6.1.1]                                                | Oxaloacetate + Glutamate => Aspartate + 2-oxoglutarate                                | WP_035351899.1 | apk:APA386 B_862  |
| 5             | aspartate kinase [EC:2.7.2.4]                                                          | Aspartate + ATP => Aspartyl 4-phosphate + ADP                                         | WP_035351732.1 | apw:APA42 C_11270 |
| 6             | homoserine dehydrogenase [EC:1.1.1.3]                                                  | Aspartate semialdehyde + NAD(P)H + H <sup>+</sup> => Homoserine + NAD(P) <sup>+</sup> | WP_006115936.1 | apk:APA386 B_992  |
| 7             | homoserine kinase Type II [EC:2.7.1.39]                                                | Homoserine + ATP => O-phospho Homoserine + ADP + H <sup>+</sup>                       | WP_006117496.1 | apw:APA42 C_19760 |

|           |                                                                 |                                                                                                              |                |                      |
|-----------|-----------------------------------------------------------------|--------------------------------------------------------------------------------------------------------------|----------------|----------------------|
| <b>8</b>  | threonine synthase<br>[EC:4.2.3.1]                              | O-phospho Homoserine +<br>H <sub>2</sub> O => Threonine +<br>Phosphate                                       | WP_006116529.1 | apk:APA386<br>B_602  |
| <b>9</b>  | threonine dehydratase<br>[EC:4.3.1.19]                          | Threonine => 2-<br>aminobut-2-enoate => 2-<br>oxobutanoate                                                   | WP_035351562.1 | apw:APA42<br>C_09850 |
| <b>10</b> | acetolactate synthase<br>I/II/III large subunit<br>[EC:2.2.1.6] | pyruvate + 2-<br>oxobutanoate => 2-<br>aceto,2-hydroxybutanoate<br>+ CO <sub>2</sub>                         | WP_035351917.1 | apk:APA386<br>B_836  |
| <b>10</b> | acetolactate synthase<br>I/II/III large subunit<br>[EC:2.2.1.6] | pyruvate + 2-<br>oxobutanoate => 2-<br>aceto,2-hydroxybutanoate<br>+ CO <sub>2</sub>                         | WP_035352550.1 | apw:APA42<br>C_03810 |
| <b>11</b> | ketol-acid<br>reductoisomerase<br>[EC:1.1.1.86]                 | 2-aceto,2-<br>hydroxybutanoate +<br>NADPH => 2,3-<br>dihydroxy,3-<br>methylpentanoate +<br>NADP <sup>+</sup> | WP_035351970.1 | apk:APA386<br>B_834  |
| <b>12</b> | dihydroxy-acid<br>dehydratase [EC:4.2.1.9]                      | 2,3-dihydroxy,3-<br>methylpentanoate => 3-<br>methy,2-oxopentanoate                                          | WP_035352258.1 | apk:APA386<br>B_1291 |
| <b>13</b> | branched-chain amino<br>acid aminotransferase<br>[EC:2.6.1.42]  | 3-methyl, 2-<br>oxopentanoate +<br>Glutamate => Isoleucine<br>+ 2-oxoglutarate                               | WP_006117469.1 | apk:APA386<br>B_855  |
| <b>13</b> | branched-chain amino<br>acid aminotransferase<br>[EC:2.6.1.42]  | 3-methyl, 2-<br>oxopentanoate +<br>Glutamate => Isoleucine<br>+ 2-oxoglutarate                               | WP_035353342.1 | apk:APA386<br>B_1001 |
